# Supplementary material for: C4N quantum dots/g-C3N4 nanosheets organic homogeneous structure self-assembly for efficient charge separation and photocatalytic hydrogen evolution
Source: Royal Society of Chemistry journal article supplement (doi:10.1039/d3qm00275f), 2023-01-01
Supplement: d3qm00275f1.pdf [file d3qm00275f1.pdf]

# **C<sub>4</sub>N Quantum Dots/g-C<sub>3</sub>N<sub>4</sub> Nanosheets Organic Homogeneous Structure Self-Assembly for Efficient Charge Separation and Photocatalytic Hydrogen Evolution**

## **1. Materials**

Cyclohexane (HKH, Aladdin, 99%), 3,3-diaminobenzidine (BPTA, Aladdin, 99%), methanol (Sinopharm, 99%), methanol (Sinopharm, 99%), Tetrahydrofuran (Macklin, 99%), N-methylpyrrolidone (NMP, Macklin, 99%), Melamine (Aladdin, 99%), Na<sub>2</sub>SO<sub>4</sub> (Aladdin, 99%), triethanolamine (Aladdin, 99%), H<sub>2</sub>PtCl<sub>6</sub> (Aladdin, 99%), Water was deionized to 18.2 MΩ · cm resistivity using the nanopure system.

## **2. Experimental section**

Synthesis of C<sub>4</sub>NQDs: The original synthesis method of C<sub>4</sub>N refers to the report in the published literature, and on this basis, C<sub>4</sub>NQDs were synthesized by hydrothermal tailoring. First, 41.6 g of cyclohexane Cyclohexane (HKH) and 42.7 g of 3,3-diaminobenzidine (BPTA) were transferred to the lining of 100 mL of polytetrafluoroethylene high-pressure reactor. Then, 25 mL of mixed solution (V<sub>methanol</sub>: V<sub>NMP</sub>=1:4) was added. After the reactor was assembled, it was reacted in an oven at 175 °C for 24 h. After cooling to room temperature, the samples were centrifuged. Finally, ethanol, tetrahydrofuran and deionized water were used for Soxhlet extraction for 3 days, and the samples were freeze-dried to obtain the pristine C<sub>4</sub>N. Take 10 mg of the pristine C<sub>4</sub>N powder prepared and transfer it to the lining of 100 mL polytetrafluoroethylene high-pressure reactor, add 50 mL of deionized water, assemble the reactor and react in an oven at 200 °C for 10h, then filter the sample with 0.22 μm water system filter membrane to obtain the final C<sub>4</sub>NQDs.

Synthesis of C<sub>3</sub>N<sub>4</sub>NSs: Pristine g-C<sub>3</sub>N<sub>4</sub> was prepared by the thermal condensation polymerization of melamine. 5 g of melamine powder was put into an aluminum oxide crucible with a cover, heated to 773 K for 4 h at the heating rate of 2 K · min<sup>-1</sup>. The

yellow product was collected and ground into a powder. 1g pristine g-C<sub>3</sub>N<sub>4</sub> powder was transferred to a 90\*60\*20 mm alumina boat, heated to 793 K for 6 h at a heating rate of 2 K min<sup>-1</sup>. The final C<sub>3</sub>N<sub>4</sub>NSs was obtained after cooling to room temperature.

Synthesis of X%C<sub>4</sub>NQDs/C<sub>3</sub>N<sub>4</sub>NSs: C<sub>4</sub>N quantum dots of different proportions (the mass ratio of 0.1%, 0.2%, 0.3%, 0.6% and 1.0%) and 25 mg C<sub>3</sub>N<sub>4</sub>NSs were added to 50 mL deionized water and stirred for 6 h at room temperature. And then stay overnight to the final X%C<sub>4</sub>NQDs/C<sub>3</sub>N<sub>4</sub>NSs.

### 3. Photocatalytic Test

The photocatalytic activity of the samples was evaluated by water splitting for hydrogen evolution under visible light irradiation. Typically, 25 mg photocatalyst and 10 mL triethanolamine (TEOA) serving as the sacrificial electron donor were added to 90 mL ultrapure water under stirring. Then, H<sub>2</sub>PtCl<sub>6</sub> aqueous solution was added as the precursor for the co-catalyst Pt, which was in-situ photo-reduced during the photocatalytic reaction (~3 wt% Pt). Next, the solution was degassed and irradiated by a 300 W Xenon lamp equipped with a 420 nm cutoff filter. The photocatalytic H<sub>2</sub> evolution rate was determined by using a GC-7900 instrument with a thermal conductivity detector (TCD) and high-purity Ar<sub>2</sub> as the carrier gas. The monochromatic light was provided by using 365±15 nm, 420±15 nm, 500±15 nm band pass filter and the average intensity of monochromatic light was determined by CEL-NP 2000 photoradiometer. The Apparent Quantum Yield was calculated by the following Equation:

$$AQY = 1.2 \times 10^8 (v \times k) / (I \times A \times \lambda) \times 100 \%$$

v: reaction rate (mol·s<sup>-1</sup>), K: Number of reaction transfer electrons, I: Optical power density(W·m<sup>-2</sup>), A: Incident light area (m<sup>2</sup>), λ: Wavelength of incident light (nm).

#### 4. X-ray electron spectroscopy

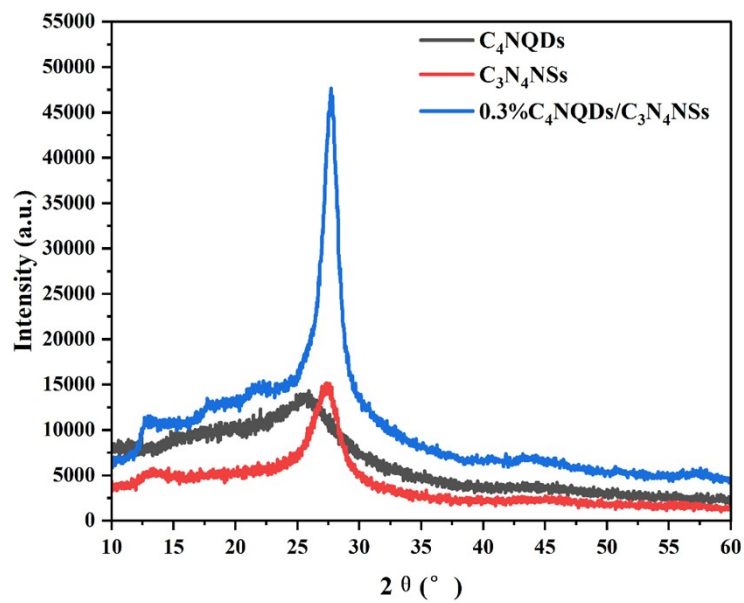

Figure S1 X-ray diffraction spectroscopy of C<sub>4</sub>NQDs, C<sub>3</sub>N<sub>4</sub>NSs and 0.3% C<sub>4</sub>NQDs/C<sub>3</sub>N<sub>4</sub>NSs.

## 5. The Tauc plots of C<sub>4</sub>NQDs and C<sub>3</sub>N<sub>4</sub>NSs.

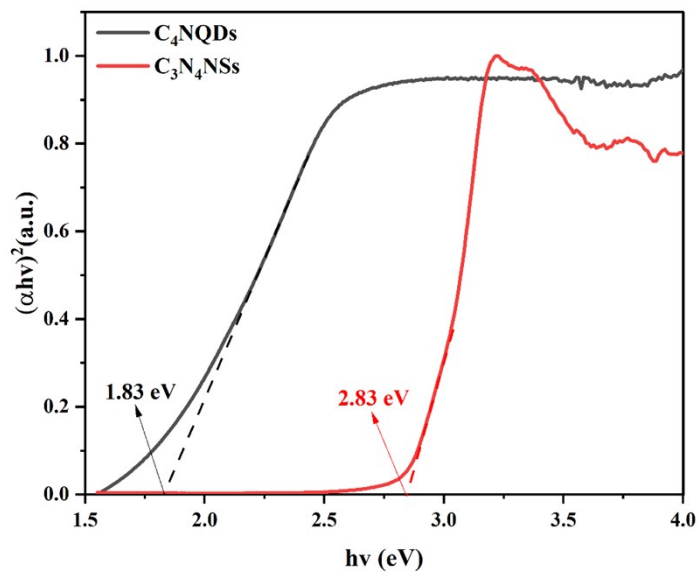

Figure S2 The corresponding Tauc plots of C<sub>4</sub>NQDs and C<sub>3</sub>N<sub>4</sub>NSs.

## 6. XPS survey spectra

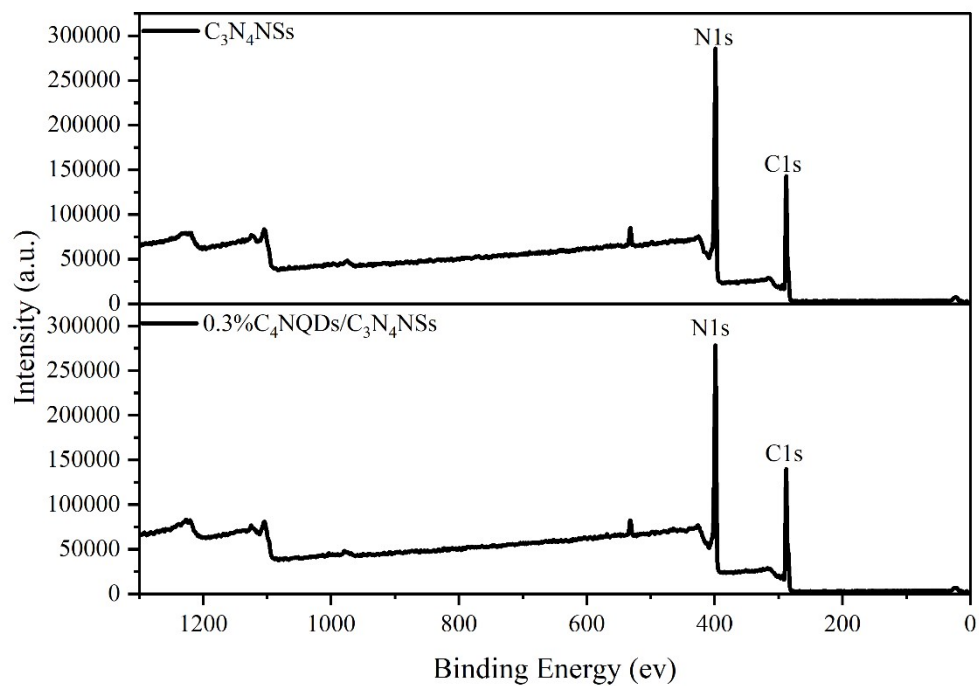

Figure S3 XPS survey spectra of  $C_3N_4NSs$  and 0.3%  $C_4NQDs/C_3N_4NSs$ .

## 7. Element content percentage

Table S1 Element content percentage of C<sub>3</sub>N<sub>4</sub>NSs and 0.3% C<sub>4</sub>NQDs/C<sub>3</sub>N<sub>4</sub>NSs.

| Sample                                                     | C%   | N%   |
|------------------------------------------------------------|------|------|
| C <sub>3</sub> N <sub>4</sub> NSs                          | 46.3 | 53.7 |
| 0.3% C <sub>4</sub> NQDs/C <sub>3</sub> N <sub>4</sub> NSs | 47.2 | 52.8 |

## 8. FTIR and XPS of 0.3% $C_4$ NQD/ $C_3N_4$ NS before and after reaction

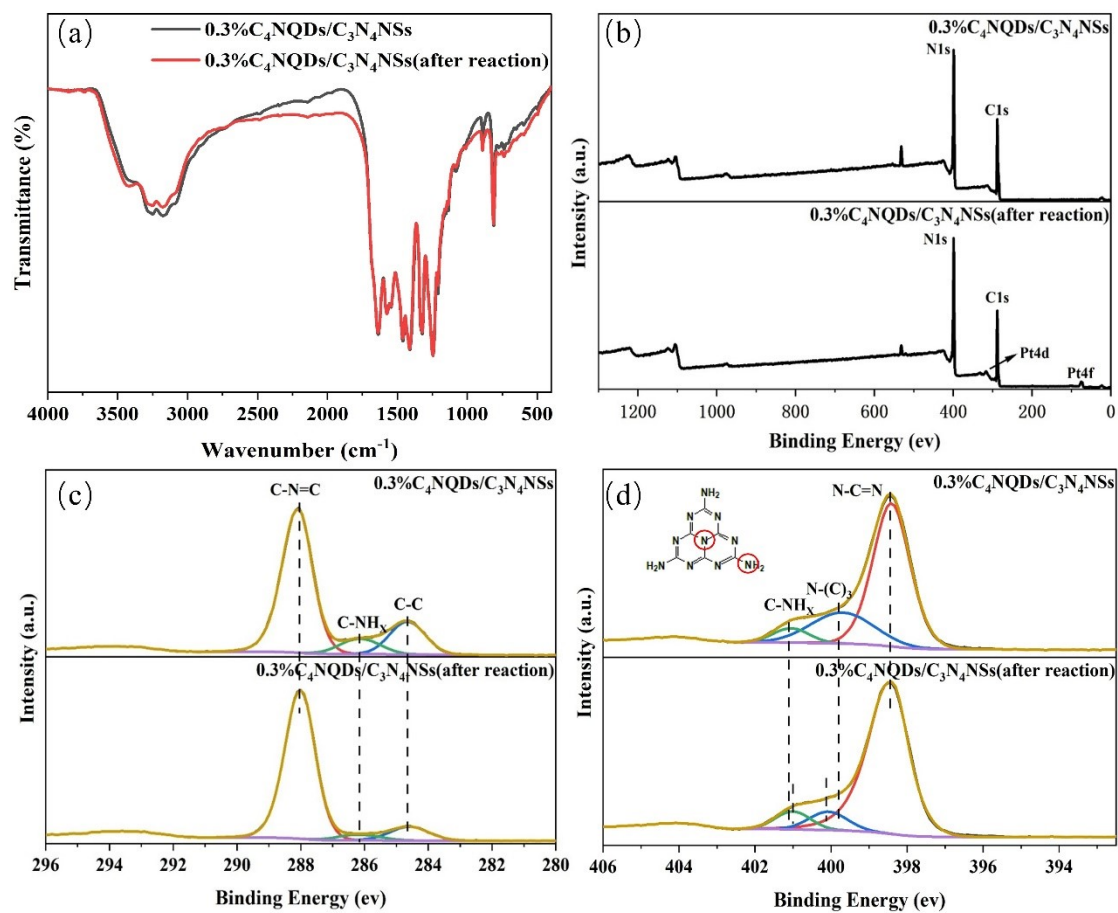

Figure S4 (a)The FTIR spectra and (b) XPS survey spectra and (c) the C1s fine spectra and (d) the N1s fine spectra of 0.3% $C_4$ NQD/ $C_3N_4$ NS before and after reaction.

### 9. XRD of 0.3% $C_4N_4$ QD/ $C_3N_4$ NS before and after reaction

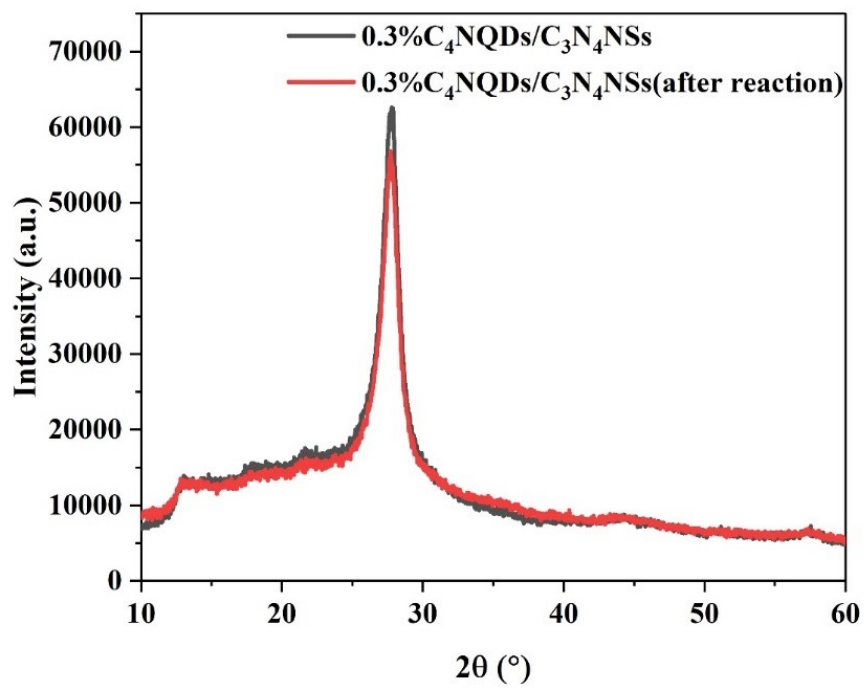

Figure S5 The XRD patterns of samples before and after reaction.



**10. TEM images of 0.3% $C_4N_4QD/C_3N_4NS$  after reaction**

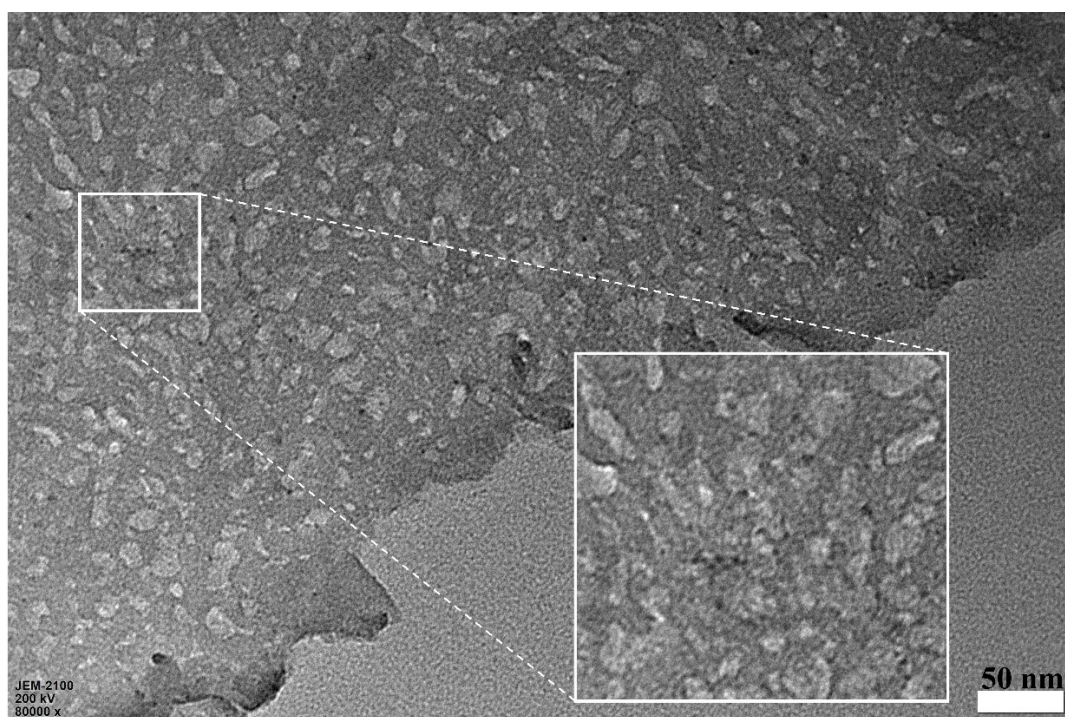

Figure S6 The TEM images of samples after reaction.

## 11. PL spectra

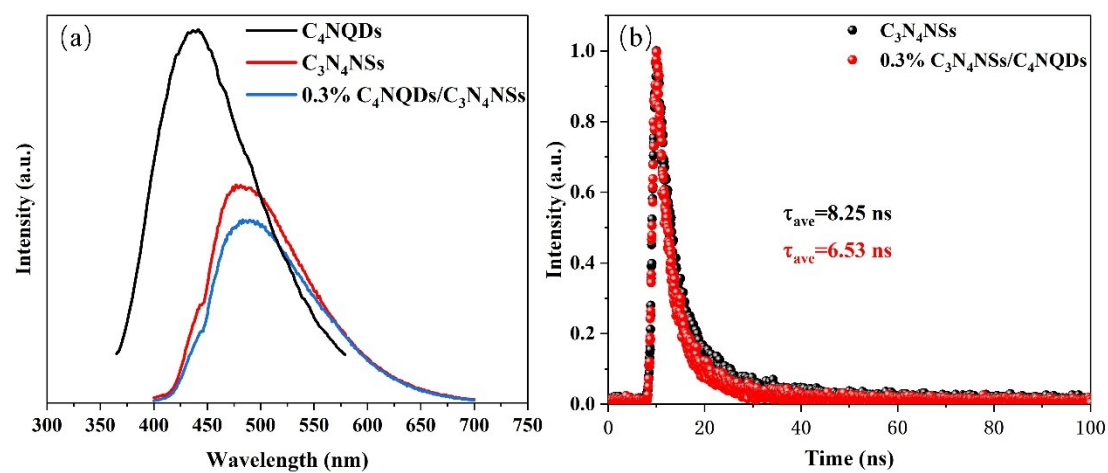

Figure S7 (a) The PL spectra of C<sub>4</sub>NQDs, C<sub>3</sub>N<sub>4</sub>NSs and 0.3% C<sub>4</sub>NQDs/C<sub>3</sub>N<sub>4</sub>NSs, (b) The transient state PL spectra of C<sub>3</sub>N<sub>4</sub>NSs and 0.3% C<sub>4</sub>NQDs/C<sub>3</sub>N<sub>4</sub>NSs.

## 12. Electrochemical impedance spectroscopy

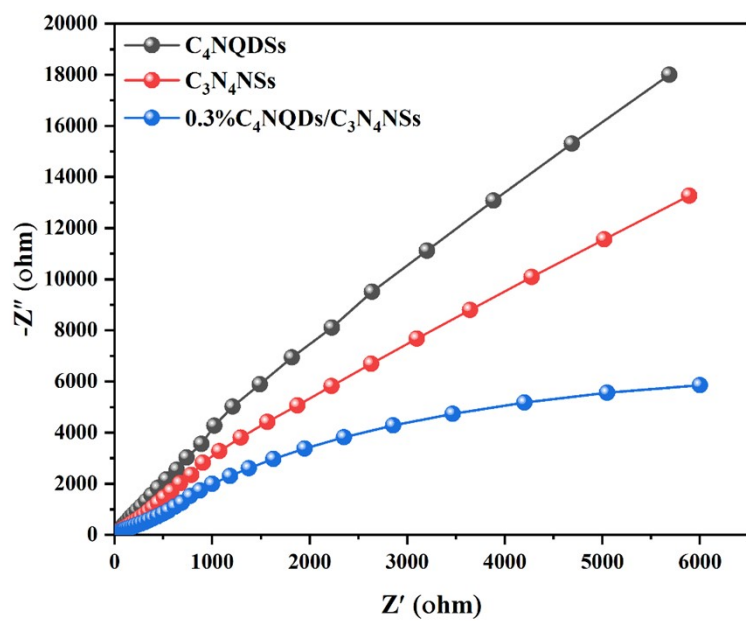

Figure S8 Electrochemical impedance spectroscopy of  $C_4NQDS$ ,  $C_3N_4NSs$  and 0.3%  $C_4NQDs/C_3N_4NSs$ .

### 13. Mott-Schottky curve

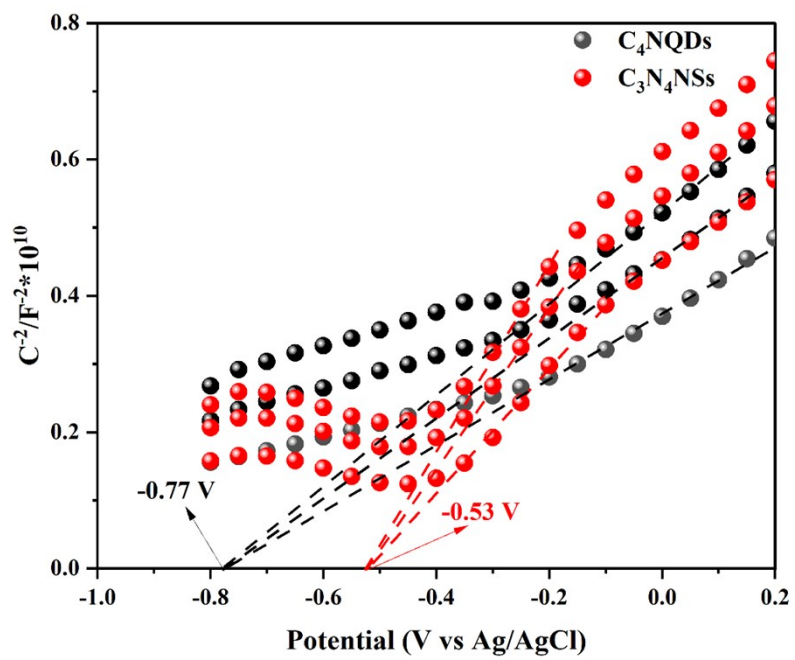

Figure S9 Mott-Schottky curve of  $C_4NQDs$  and  $C_3N_4NSs$
